# Supplementary material for: Did Inequalities in Mothers’ and Children’s Health and Well-Being in Japan Increase through the Pandemic? Evidence from Nationwide Surveys and Routinely Collected Data
Source: MDPI journal article supplement (doi:10.3390/children11030330), 2024-03-09
Supplement: s1 [file s1]

**Table S1** : Questions and available responses for key indicators

| Key indicators                            | Category              | Available Responses                                                                                                                                    |
|-------------------------------------------|-----------------------|--------------------------------------------------------------------------------------------------------------------------------------------------------|
| Mother's part-time work                   | Part-time work        | [Part-time] [Temporary or Non-member contract]                                                                                                         |
|                                           | Others                | [Full-time] [Self-employed] [Unemployed] [House wife] [Others]                                                                                         |
| Mother's expenses always put off          | Yes                   | [I always put myself off] [I spend less on myself than my partner]                                                                                     |
|                                           | Others                | [I spend on myself in the same way as my partner]                                                                                                      |
| Mother's self-reported well-being         | <average              | [Unhappy] [Comparatively unhappy]                                                                                                                      |
|                                           | Others                | [Happy] [Comparatively happy] [None of them]                                                                                                           |
| School attendance subsidy                 | Yes                   | [We receive it]                                                                                                                                        |
|                                           | Others                | [We don't receive it] [I don't know which one]                                                                                                         |
| Public assistance                         | Not necessary         | [There is no need to receive it]                                                                                                                       |
|                                           | Others                | [I don't want to receive it] [I want it but haven't consulted]                                                                                         |
|                                           |                       | [I asked about it but was refused by the welfare department]                                                                                           |
|                                           | Don't want to receive | [I don't want to receive it]                                                                                                                           |
| Influenza vaccine for school-age children | Yes                   | [The child was vaccinated at the required frequency]                                                                                                   |
|                                           | Others                | [The child took it but couldn't complete] [The child didn't take it]                                                                                   |
|                                           |                       | [I didn't know how the child could take it]                                                                                                            |
| Eating breakfast alone                    | Yes                   | [The child eats alone]                                                                                                                                 |
|                                           | Others                | [The child mostly eats with all the family]<br>[The child eats with some of the family]                                                                |
| A quiet space to do homework              | Yes                   | [Child's room and desk] [Child's desk and shared room]<br>[Shared room and desk] [Child's desk in the living room]<br>[Shared desk in the living room] |
|                                           | Others                | [There is no special study space]                                                                                                                      |
